# Supplementary material for: The complete conversion of bleached kraft pulp into dissolving pulp and two xylo-oligosaccharides through a deep eutectic solvent-assisted biorefinery
Source: Royal Society of Chemistry journal article supplement (doi:10.1039/d3gc03217e), 2023-01-01
Supplement: d3gc03217e1.pdf [file d3gc03217e1.pdf]

## Supporting information

### **Complete conversion of bleached Kraft pulp into dissolving pulp and two xylo-oligosaccharides through a deep eutectic solvent assisted biorefinery**

Qiongyao Su,<sup>a</sup> Yujie Guo,<sup>a</sup> Mei Huang,<sup>a</sup> Li Zhao<sup>a</sup>, Churui Huang<sup>a</sup>, Jianmei Zou<sup>b</sup>, Yan  
Liu<sup>b</sup>, Jinguang Hu<sup>c</sup>, Fei Shen<sup>a</sup> and Dong Tian<sup>\*a</sup>

*a. College of Environmental Sciences, Sichuan Agricultural University, Chengdu,  
Sichuan 611130, PR China*

*b. Department of Chemical and Petroleum Engineering, University of Calgary, 2500  
University Dr. NW, Calgary, AB T2N 1N4, Canada*

**\* Corresponding author**

Dong Tian, E-mail: dongtian@sicau.edu.cn. Tel: +86-028-86291233

### Content list:

Three figs (Fig S1, S2 and S3)

One table (Table S1)

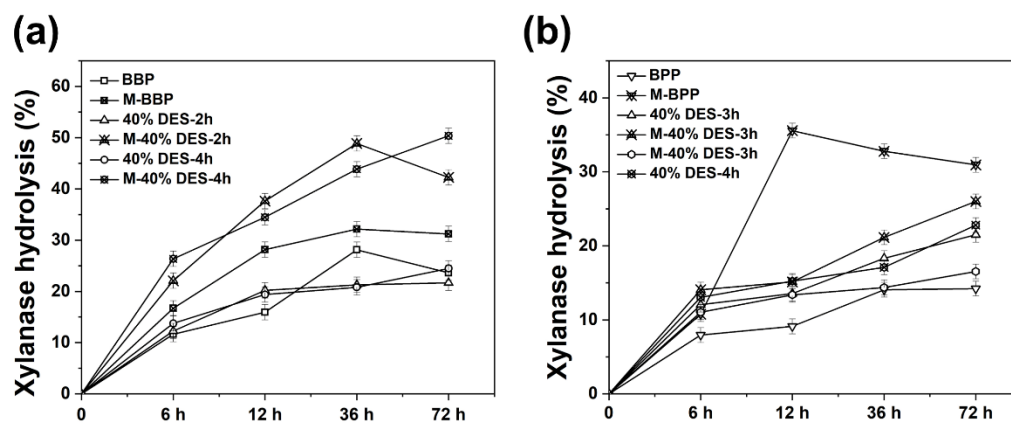

**Fig. S1.** (a), (b) the enzymatic efficiency of BBP and BPP before and after mechanical refining at 2% (w/v) solids load and 5 mg g<sup>-1</sup> xylanase respectively.

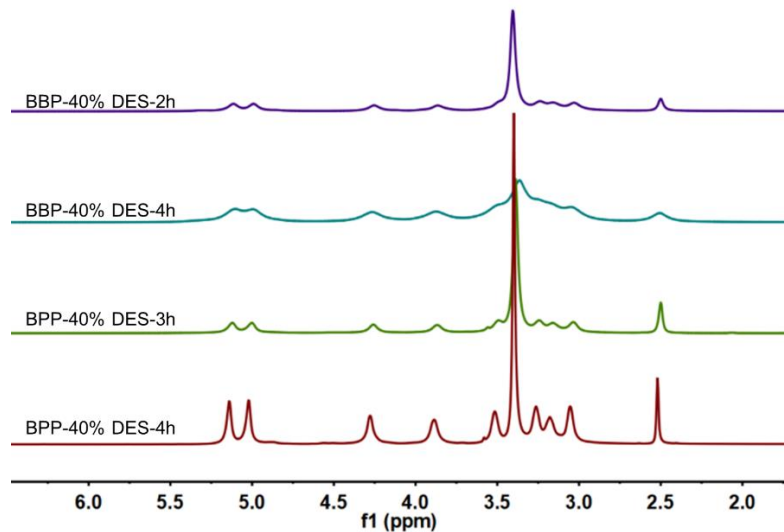

**Fig. S2.** <sup>1</sup>H NMR spectra of BBP and BPP under two DES pretreatment conditions.

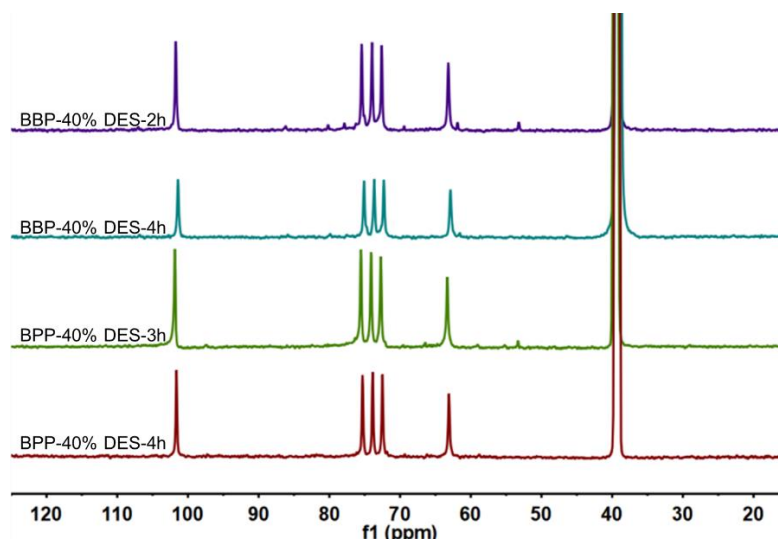

**Fig. S3.**  $^{13}\text{C}$  NMR spectra of BBP and BPP under two DES pretreatment conditions.

**Table S1.** Assignment of main  $^{13}\text{C}$ - $^1\text{H}$  cross-signals in HSQC spectra of these DES oligosaccharides.

| label                  | $\delta_{\text{C}}/\delta_{\text{H}}$ (ppm) | assignment                                                            |
|------------------------|---------------------------------------------|-----------------------------------------------------------------------|
| $\text{X}_{\alpha}$    | 92.0/5.10                                   | $\text{C}_1\text{-H}_1$ in alpha-xylose                               |
| $\text{X}_{\beta}$     | 96.5/4.50                                   | $\text{C}_1\text{-H}_1$ in beta-xylose                                |
| $\text{Xi}, \text{Xt}$ | 101.4-101.8/4.38-4.49                       | $\text{C}_1\text{-H}_1$ in xylose and non-reducing end groups         |
| $\text{Xi}$            | 72.7/3.19                                   | $\text{C}_2\text{-H}_2$ in hemicellulose inter chain xylose           |
|                        | 73.6/3.47                                   | $\text{C}_3\text{-H}_3$ in hemicellulose inter chain xylose           |
|                        | 76.4/3.71                                   | $\text{C}_4\text{-H}_4$ in hemicellulose inter chain xylose           |
|                        | 63.0/3.32/4.04                              | $\text{C}_5\text{-H}_5$ in hemicellulose inter chain xylose           |
|                        | 75.6/3.38                                   | $\text{C}_3\text{-H}_3$ in non-reducing end groups                    |
| $\text{Xt}$            | 69.2/3.55                                   | $\text{C}_4\text{-H}_4$ in non-reducing end groups                    |
|                        | 65.2/3.22/3.88                              | $\text{C}_5\text{-H}_5$ in non-reducing end groups                    |
|                        |                                             |                                                                       |
| $\text{At}$            | 107.6/5.31                                  | $\text{C}_1\text{-H}_1$ in L-arabinose                                |
|                        | 80.7/4.07                                   | $\text{C}_2\text{-H}_2$ in L-arabinose                                |
|                        | 77.2/3.85                                   | $\text{C}_3\text{-H}_3$ in L-arabinose                                |
|                        | 84.8/4.21                                   | $\text{C}_4\text{-H}_4$ in L-arabinose                                |
|                        | 61.3/3.70/3.72                              | $\text{C}_5\text{-H}_5$ in L-arabinose                                |
| $\text{UA}$            | 97.5/5.20                                   | $\text{C}_1\text{-H}_1$ in 4-O-methyl- $\alpha$ -D-glucuronide groups |
|                        | 72.2/3.54                                   | $\text{C}_2\text{-H}_2$ in 4-O-methyl- $\alpha$ -D-glucuronide groups |
|                        | 73.3/3.71                                   | $\text{C}_3\text{-H}_3$ in 4-O-methyl- $\alpha$ -D-glucuronide groups |
|                        | 82.4/3.17                                   | $\text{C}_4\text{-H}_4$ in 4-O-methyl- $\alpha$ -D-glucuronide groups |
|                        | 71.4/4.27                                   | $\text{C}_5\text{-H}_5$ in 4-O-methyl- $\alpha$ -D-glucuronide groups |
|                        | 59.8/3.38                                   | $\text{OCH}_3$                                                        |
